# Supplementary material
Source: publisher figshare collection journal article supplement (https://geolsoc.figshare.com/ndownloader/files/24575921)
Supplement: Supplementary file 1 [file 24575921]

**Actlabs Code: A17-08108**  
**Date: December, 2017**  
**Attention:** Souley Baraou  
Universite de Niamey

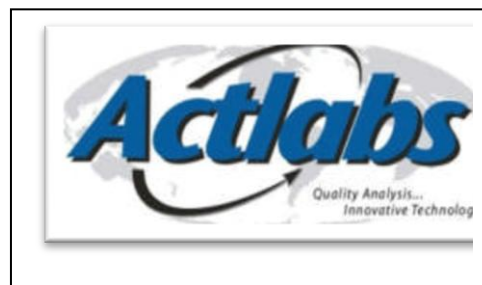

**Reports by:**

Mahdi Ghobadi, PhD; [MahdiGhobadi@Actlabs.com](mailto:MahdiGhobadi@Actlabs.com)

**Methodology:**

U-Pb dating was carried out using a Resonetics RESolution M-50 series 193nm excimer laser ablation system equipped with a Laurin Technic Pty S-155 ablation cell. Ablation was conducted in a mixed He (300 mL/min) and Ar (930 mL/min) carrier gas and mixed with N<sub>2</sub> (2 mL/min) downstream of the cell. Contamination at mass 204 from Hg in the carrier gases was <150cps. All data was collected using a 36  $\mu\text{m}$   $\varnothing$  laser crater, a repetition rate of 3 Hz, and laser fluence of 3 J/cm<sup>2</sup>. The data were standardized against FC1 zircon (1099  $\pm$  2 Ma) which was analyzed at least 16 times per run and distributed evenly throughout the sequence. Each ablation was 30 sec in duration and was preceded by 30 sec of background collection. Ablated aerosol was transferred to the ICP-MS using nylon tubing with an in-line 'squid' smoothing device connected immediately before the junction with the ICP-MS torch. Isotope intensities were measured using an Agilent 7700x quadrupole-ICP-MS operated in 'auto' detector mode: sensitivity and P/A factors were tuned by rastering across NIST610 glass before the start of each run. A second external rotary pump was used to enhance sensitivity. The ICP-MS method measured <sup>90</sup>Zr, <sup>202</sup>Hg, <sup>204</sup>Pb, <sup>206</sup>Pb, <sup>207</sup>Pb, <sup>208</sup>Pb, <sup>232</sup>Th and <sup>238</sup>U with a total quadrupole sweep time of 0.26 seconds. The background corrected <sup>202</sup>Hg ion beam measured during ablation was used to peak strip any small excess <sup>204</sup>Hg from <sup>204</sup>Pb signal using the <sup>202</sup>Hg/<sup>204</sup>Hg measured on the gas background. The magnitude of this correction was typically insignificant. The data were reduced offline using VizualAge (Petrus and Kamber 2012) and Lolite v2.5 (Paton et al. 2011) running as plugins in Wavemetrics Igor Pro 6.23. Concentration data were calculated relative to NIST610 (distributed throughout the sequence) and using the Lolite trace-elements "internal standardization" data reduction scheme. An estimated value of 44 wt% Zr in zircon was used as the internal standard composition. Common-Pb was corrected (if necessary) using the background-corrected and Hg-interference corrected <sup>204</sup>Pb intensity, a common-Pb composition based on Kramers and Tolstikhin (1997) Pb-Pb evolution curve and an estimate of the age of the zircon based on the uncorrected <sup>206</sup>Pb/<sup>238</sup>U age. This correction method is suitable for grains with modest common-Pb content and minor Pb-loss. The %Pb\* estimate reported in the data tables was taken from the Andersen (2002) routine implemented in VizualAge.

**Plešovice zircon – consistency standards**

The Plešovice zircon standard is from the Bohemian Massif, Czech Republic, and was provided by Jiří Sláma (Bergen). This zircon has a concordant U–Pb age with a weighted mean <sup>206</sup>Pb/<sup>238</sup>U date of 337.13  $\pm$  0.37 Ma (ID-TIMS, 95% confidence limits) taken from taken Sláma et al (2008). This material is locally affected by minor recent Pb-loss.

**References**

- Andersen, T. 2002. Correction of common lead in U-Pb analyses that do not report <sup>204</sup>Pb. *Chemical Geology* **192**: 59-79.
- Kramers, J.D., and Tolstikhin, I.N. 1997. Two terrestrial lead isotope paradoxes, forward transport modeling, core formation and the history of the continental crust. *Chemical Geology* **139**: 75-110.
- Paton, C., Hellstrom, J.C., Paul, B., Woodhead, J.D., and Hergt, J.M. 2011. Lolite: Freeware for the visualisation and processing of mass spectrometric data. *Journal of Analytical Atomic Spectrometry* **26**: 2508-2518.
- Petrus, J.A., and Kamber, B.S. 2012. VizualAge: A novel approach to laser ablation ICP-MS U-Pb geochronology data reduction. *Geostandards and Geoanalytical Research* **36**: 247-270. doi: 10.1111/j.1751-908X.2012.00158.x
- Slama, J., Kosler, J., Condon, D.J., Crowley, J.L., Gerdes, A., Hanchar, J.M., Horstwood, M.S.A., Morris, G.A., Nasdala, L., Norberg, N., Schaltegger, U., Schoene, B., Tubrett, M.N., and Whitehouse, M.J. 2008. Plesovice zircon - A new natural reference material for U-Pb and Hf isotopic microanalysis. *Chemical Geology* **249**(1-2): 1-35. doi: 10.1016/j.chemgeo.2007.11.005.
